# Supplementary material for: Understanding parent experiences of end-of-life care for children: A systematic review and qualitative evidence synthesis
Source: PubMed Central journal article supplement — Palliat Med. 2022 Dec 22;37(2):178–202. doi: 10.1177/02692163221144084 (PMC9896294; doi:10.1177/02692163221144084), 2022-12-22
Supplement: sj-pdf-1-pmj-10.1177_02692163221144084.pdf [file sj-pdf-1-pmj-10.1177_02692163221144084.pdf]

Supplementary table 1: Search Strategy used in MEDLINE via OVID

|    |                                                                              |
|----|------------------------------------------------------------------------------|
|    |                                                                              |
| 1  | Qualitative Research/                                                        |
| 2  | Interview/                                                                   |
| 3  | Personal Narrative/                                                          |
| 4  | Grounded Theory/                                                             |
| 5  | Focus Groups/                                                                |
| 6  | Hermeneutics/                                                                |
| 7  | Anthropology, Cultural/                                                      |
| 8  | qualitative.af.                                                              |
| 9  | interview*.af.                                                               |
| 10 | experiences.ti. or experiences.ab.                                           |
| 11 | views.ti. or views.ab.                                                       |
| 12 | perspectives*.ti. or perspectives*.ab.                                       |
| 13 | narrative.ti. or narrative.ab.                                               |
| 14 | ethnograph*.ti. or ethnograph*.ab.                                           |
| 15 | ("case study" or "case studies").ti. or ("case study" or "case studies").ab. |
| 16 | thematic analysis.ti. or "thematic analysis".ab.                             |
| 17 | themes.ti. or themes.ab.                                                     |
| 18 | grounded theory.ti. or grounded theory.ab.                                   |
| 19 | field notes.ti. or field notes.ab.                                           |
| 20 | audio record*.ti. or audio record*.ab.                                       |
| 21 | focus group*.ti. or focus group*.ab.                                         |
| 22 | conversation* analys*.ti. or conversation* analys*.ab.                       |
| 23 | descriptive stud*.ti. or descriptive stud*.ab.                               |
| 24 | discourse analys*.ti. or discourse analys*.ab.                               |
| 25 | exploratory analys*.ti. or exploratory analys*.ab.                           |
| 26 | exploratory stud*.ti. or exploratory stud*.ab.                               |
| 27 | Hermeneutic*.ti. or Hermeneutic*.ab.                                         |
| 28 | naturalistic.ti. or naturalistic.ab.                                         |
| 29 | phenomenolog*.ti. or phenomenolog*.ab.                                       |
| 30 | participatory.ti. or participatory.ab.                                       |
| 31 | semi structured.ti. or semi structured.ab.                                   |
| 32 | key informant*.ti. or key informant*.ab.                                     |
| 33 | cultural anthropology.ti. or cultural anthropology.ab.                       |

|    |                                                                                                                                                                                                                         |
|----|-------------------------------------------------------------------------------------------------------------------------------------------------------------------------------------------------------------------------|
| 34 | narrative analysis.ti. or narrative analysis.ab.                                                                                                                                                                        |
| 35 | inductive.af.                                                                                                                                                                                                           |
| 36 | content analysis.ti. and content analysis.ab.                                                                                                                                                                           |
| 37 | discourse analysis.ti. and discourse analysis.ab.                                                                                                                                                                       |
| 38 | narration.ti. and narration.ab.                                                                                                                                                                                         |
| 39 | 1 or 2 or 3 or 4 or 5 or 6 or 7 or 8 or 9 or 10 or 11 or 12 or 13 or 14 or 15 or 16 or 17 or 18 or 19 or 20 or 21 or 22 or 23 or 24 or 25 or 26 or 27 or 28 or 29 or 30 or 31 or 32 or 33 or 34 or 35 or 36 or 37 or 38 |
| 40 | limit 39 to (english language and yr="2000 -Current")                                                                                                                                                                   |
| 41 | Child/ or Child, Preschool/                                                                                                                                                                                             |
| 42 | Infant/ or Infant, newborn/                                                                                                                                                                                             |
| 43 | Adolescent/                                                                                                                                                                                                             |
| 44 | Minors/                                                                                                                                                                                                                 |
| 45 | exp Pediatrics/                                                                                                                                                                                                         |
| 46 | (child* or Children*).ab. or (child* or children*).ti.                                                                                                                                                                  |
| 47 | (infant* or infancy*).ab. or (infant* or infancy*).ti.                                                                                                                                                                  |
| 48 | (baby or baby* or babies).ab. or (baby or baby* or babies).ti.                                                                                                                                                          |
| 49 | (toddler* or kid or kids).ab. or (toddler* or kid or kids).ti.                                                                                                                                                          |
| 50 | (boy or boys or boyhood or girl or girls or girlhood).ab. or (boy or boys or boyhood or girl or girls or girlhood).ti.                                                                                                  |
| 51 | (minor or minors* or schoolchild*).ab. or (minor or minors* or schoolchild*).ti.                                                                                                                                        |
| 52 | (adolescen* or juvenil* or youth* or teen* or "under age*" or underage* or pubescen*).ab. or (adolescen* or juvenil* or youth* or teen* or "under age*" or underage* or pubescen*).ti.                                  |
| 53 | (pediatric* or paediatric* or peadiatric*).ab. or (pediatric* or paediatric* or peadiatric*).ti.                                                                                                                        |
| 54 | ("young people*" or "young person*").ab. or ("young people*" or "young person*").ti.                                                                                                                                    |
| 55 | (newborn* or neonat*).ti. or (newborn* or neonat*).ab.                                                                                                                                                                  |
| 56 | 41 or 42 or 43 or 44 or 45 or 46 or 47 or 48 or 49 or 50 or 51 or 52 or 53 or 54 or 55                                                                                                                                  |
| 57 | limit 56 to (english language and yr="2000 -Current")                                                                                                                                                                   |
| 58 | Terminally Ill/                                                                                                                                                                                                         |
| 59 | Resuscitation Orders/                                                                                                                                                                                                   |
| 60 | exp Advance Directives/                                                                                                                                                                                                 |
| 61 | exp Terminal Care/                                                                                                                                                                                                      |
| 62 | Palliative Care/                                                                                                                                                                                                        |
| 63 | Hospice Care/                                                                                                                                                                                                           |

|           |                                                                                                                                                                                                                                                                                |
|-----------|--------------------------------------------------------------------------------------------------------------------------------------------------------------------------------------------------------------------------------------------------------------------------------|
| 64        | Palliative Medicine/                                                                                                                                                                                                                                                           |
| 65        | Hospice and Palliative Care Nursing/                                                                                                                                                                                                                                           |
| 66        | ((terminal* or advanced or incurable or life-limit* or life-threaten*) adj2 (ill* or disease* or condition* or phase* or stage*)).ti. or ((terminal* or advanced or incurable or life-limit* or life-threaten*) adj2 (ill* or disease* or condition* or phase* or stage*)).ab. |
| 67        | (terminal* adj2 (care or caring)).ti. or (terminal* adj2 (care or caring)).ab.                                                                                                                                                                                                 |
| 68        | (end adj2 life).ti. or (end adj2 life).ab.                                                                                                                                                                                                                                     |
| 69        | palliat*.ti. or palliat*.ab.                                                                                                                                                                                                                                                   |
| 70        | hospice*.ti. or hospice*.ab.                                                                                                                                                                                                                                                   |
| 71        | dying.ti. or dying.ab.                                                                                                                                                                                                                                                         |
| 72        | 58 or 59 or 60 or 61 or 62 or 63 or 64 or 65 or 66 or 67 or 68 or 69 or 70 or 71                                                                                                                                                                                               |
| 73        | limit 72 to (english language and yr="2000 -Current")                                                                                                                                                                                                                          |
| <b>74</b> | <b>40 and 57 and 73</b>                                                                                                                                                                                                                                                        |
