# Supplementary material for: Understanding parent experiences of end-of-life care for children: A systematic review and qualitative evidence synthesis
Source: PubMed Central journal article supplement — Palliat Med. 2022 Dec 22;37(2):178–202. doi: 10.1177/02692163221144084 (PMC9896294; doi:10.1177/02692163221144084), 2022-12-22
Supplement: sj-pdf-2-pmj-10.1177_02692163221144084.pdf [file sj-pdf-2-pmj-10.1177_02692163221144084.pdf]

Supplementary Table 2: Papers meeting inclusion criteria but not included in the synthesis

| Author<br>Year                  | Country           | Setting                 | Child characteristics                |                                              |                                                                | Parent<br>participants                      | Study design                                                                                                                                                                                                                 | Aim  | Summary<br>methodological<br>assessment | Combined<br>data richness<br>/relevance<br>score |
|---------------------------------|-------------------|-------------------------|--------------------------------------|----------------------------------------------|----------------------------------------------------------------|---------------------------------------------|------------------------------------------------------------------------------------------------------------------------------------------------------------------------------------------------------------------------------|------|-----------------------------------------|--------------------------------------------------|
|                                 |                   |                         | Condition                            | Age                                          |                                                                |                                             |                                                                                                                                                                                                                              |      |                                         |                                                  |
| Armentrout<br>2009 <sup>1</sup> | United<br>States  | Hospital<br>Home        | All neonatal                         | Range: 2<br>days-2<br>mths                   | 15 Parents<br>- 11 Mothers<br>- 4 Fathers                      | Grounded<br>theory                          | To explore with parents how life support decisions were made for their infants, the roles they had in the decision-making process and how the decisions and subsequent death of their infants influence their everyday lives | Low  | 2                                       |                                                  |
| Armentrout<br>2007 <sup>2</sup> | United<br>States  | Hospital<br>Home        | All neonatal                         | Range: 2<br>days-2<br>mths                   | 15 Parents<br>- 11 Mothers<br>- 4 Fathers                      | Grounded<br>theory                          | To addresses parents' perspectives about the life support decisions they made, their infant's death, and the nature and meaning of their everyday lives after the infant's death.                                            | Med  | 2                                       |                                                  |
| Beecham<br>2017 <sup>3</sup>    | United<br>Kingdom | Palliative<br>care team | Mix of LLC<br>conditions             | Range: 0-<br>17 yrs                          | 21 Parents<br>- 15 Mothers<br>- 5 Fathers<br>- 1<br>Stepmother | Grounded<br>theory                          | To explore parents' experience in the UK of ACP discussions for children for whom cure is not likely.                                                                                                                        | High | 1                                       |                                                  |
| Bogetz<br>2020 <sup>4</sup>     | United<br>States  | Children's<br>hospital  | All complex<br>chronic<br>conditions | Mean:<br>11.1 yrs<br>Range: 1.9-<br>2.03 yrs | 110 Parents<br>-83 Mothers<br>- 19 Fathers                     | Prospective<br>cross-<br>sectional<br>study | To elucidate supportive clinical care strategies identified by bereaved parents of children with complex chronic conditions.                                                                                                 | Med  | 2                                       |                                                  |
| Bogetz<br>2021 <sup>5</sup>     | United<br>States  | Children's<br>hospital  | All complex<br>chronic<br>conditions | Mean:<br>11.1 yrs<br>Range: 1.9-<br>2.0 yrs  | 110 Parents<br>- 83 Mothers<br>- 19 Fathers                    | Prospective<br>cross-<br>sectional<br>study | To elucidate supportive clinical care strategies identified by bereaved parents of children with complex chronic conditions.                                                                                                 | Med  | 2                                       |                                                  |
| Branchett<br>2012 <sup>6</sup>  | United<br>Kingdom | Not<br>reported         | All neonatal                         | Not<br>reported                              | 57 Parents<br>- 54 Mothers<br>- 3 Fathers                      | Inductive<br>study                          | To determine what parents had experienced relating to neonatal palliative and end of life care and determine how this knowledge could be used to improve experiences for families in future.                                 | Low  | 2                                       |                                                  |

| Author<br>Year                  | Country           | Setting            | Child characteristics                                                       |                                             |                                            | Parent<br>participants                   | Study design                                                                                                                                                                                  | Aim  | Summary<br>methodological<br>assessment | Combined<br>data richness<br>/relevance<br>score |
|---------------------------------|-------------------|--------------------|-----------------------------------------------------------------------------|---------------------------------------------|--------------------------------------------|------------------------------------------|-----------------------------------------------------------------------------------------------------------------------------------------------------------------------------------------------|------|-----------------------------------------|--------------------------------------------------|
|                                 |                   |                    | Condition                                                                   | Age                                         |                                            |                                          |                                                                                                                                                                                               |      |                                         |                                                  |
| Brenner<br>2016 <sup>7</sup>    | Ireland           | Hospice at<br>home | Not reported                                                                | Not<br>reported                             | 7 Parents                                  | Qualitative<br>evaluation<br>methodology | To understand the experiences of families receiving a nurse led pilot hospice at home programme and the experiences of healthcare professionals delivering and engaging with the programme    | High | 1                                       |                                                  |
| Brinchmann<br>2002 <sup>8</sup> | Norway            | Neonatal<br>Units  | All pre-term                                                                | Gestationa<br>l age 24-40<br>wks            | 35 Parents<br>- 19 Mothers<br>- 16 Fathers | Descriptive<br>study                     | To generate knowledge about parents' participation in life-and-death decisions concerning very premature and/or critically ill infants who are in hospital neonatal units                     | High | 3                                       |                                                  |
| Brosig<br>2007 <sup>9</sup>     | United<br>States  | PICU<br>NICU       | all infants -<br>mixed<br>conditions                                        | Mean:<br>62.9 days<br>Range: 1-<br>280 days | 29 Parents<br>-18 Mothers<br>-11 Fathers   | Explorative<br>study                     | To identify factors important to parents in their infant's end-of-life care.                                                                                                                  | Med  | 2                                       |                                                  |
| Brouwer<br>2020 <sup>10</sup>   | Netherland<br>s   | Hospital           | Mixed life<br>threatening<br>conditions                                     | Range: 1-<br>12 yrs                         | 64 Parents<br>- 42 Mothers                 | Qualitative<br>study                     | To identify barriers, as perceived by parents, to good care for children with life-threatening conditions.                                                                                    | Med  | 2                                       |                                                  |
| Butler<br>2018 c <sup>11</sup>  | Australia         | PICU               | Mixed<br>conditions                                                         | Range: <1<br>yr->13 yrs                     | 26 Parents<br>- 18 Mothers<br>- 8 Fathers  | Constructivist<br>grounded<br>theory     | To explore bereaved parents' interactions with healthcare providers when a child dies in a paediatric intensive care unit.                                                                    | High | 2                                       |                                                  |
| Butler<br>2019 <sup>12</sup>    | Australia         | PICU               | Mixed<br>conditions                                                         | Range: <1<br>yr->13 yrs                     | 26 Parents<br>- 18 Mothers<br>- 8 Fathers  | Constructivist<br>grounded<br>theory     | To describe bereaved parent recommendations for improvement in end-of-life care and bereavement follow-up when a child dies in intensive care                                                 | Low  | 1                                       |                                                  |
| Bužgová<br>2015 <sup>13</sup>   | Czech<br>Republic | Home<br>Hospital   | Mixed life-<br>limiting or life-<br>threatening<br>conditions<br>- 2 cancer | 1 mth-16<br>yrs                             | 6 Parents                                  | Qualitative<br>study                     | To identify and describe the problems and experiences of family members caring for children with life-threatening or life-limiting diseases from diagnosis to the eventual death of the child | Med  | 1                                       |                                                  |

| Author<br>Year                   | Country          | Setting                | Child characteristics                                     |                                               |                                                                            | Parent<br>participants                                       | Study design                                                                                                                                                                          | Aim  | Summary<br>methodological<br>assessment | Combined<br>data richness<br>/relevance<br>score |
|----------------------------------|------------------|------------------------|-----------------------------------------------------------|-----------------------------------------------|----------------------------------------------------------------------------|--------------------------------------------------------------|---------------------------------------------------------------------------------------------------------------------------------------------------------------------------------------|------|-----------------------------------------|--------------------------------------------------|
|                                  |                  |                        | Condition                                                 | Age                                           |                                                                            |                                                              |                                                                                                                                                                                       |      |                                         |                                                  |
| Cacciatore<br>2019 <sup>14</sup> | United<br>States | Not<br>reported        | Mixed<br>conditions<br>- mostly cancer                    | 4 mths-22<br>yrs                              | 17 Parents<br>- 13 mother<br>- 4 Fathers                                   | Qualitative<br>descriptive<br>methodology                    | To qualitatively evaluate parents'<br>perceptions of their experiences with<br>HCPs before and after the death of their<br>child in a variety of settings and<br>geographic locations | Med  | 2                                       |                                                  |
| Caeymaex<br>2011 <sup>15</sup>   | France           | NICU                   | Mixed<br>conditions<br>- 71% preterm                      | Mean<br>gestational<br>age 31.2<br>weeks      | 164 Parents<br>- 103 Mothers<br>- 61 Fathers                               | Retrospective<br>longitudinal<br>design                      | To explore parents' experience of the<br>EOL DMP for their child in the NICU.                                                                                                         | Med  | 3                                       |                                                  |
| Coats<br>2016 <sup>16</sup>      | United<br>States | Pediatric<br>BMT unit  | All cancer<br>all received a<br>bone marrow<br>transplant | Range: 2-8<br>yrs                             | 7 Parents<br>- 5 Mothers<br>2 Fathers                                      | Grounded<br>theory                                           | To describe parents' experiences and<br>their perspectives of transitions that<br>occurred along the trajectory of their<br>child's illness                                           | High | 2                                       |                                                  |
| Collins<br>2016 <sup>17</sup>    | Australia        | Paediatric<br>hospice  | Mixed<br>conditions<br>all life limited<br>conditions     | median 10<br>yrs<br>Range:<br>3mths-17<br>yrs | 14 Parents<br>- 12 Mothers<br>- 2 Fathers                                  | Cross-<br>sectional,<br>prospective,<br>qualitative<br>study | To provide an in-depth exploration of<br>the prevalent lived experiences of<br>parents who are currently providing<br>care for a child with a life-limiting<br>condition in Australia | High | 1                                       |                                                  |
| Contro<br>2002 <sup>18</sup>     | United<br>States | Children's<br>hospital | Mixed<br>conditions                                       | Range: 0-<br>18                               | 61 Parents<br>-40 Mothers<br>(incl 2 foster<br>and 1 step)<br>- 21 Fathers | Mixed<br>methods                                             | To obtain personal accounts of families'<br>experiences to learn ways in to improve<br>care for pediatric patients and their<br>families                                              | Med  | 2                                       |                                                  |
| Contro<br>2004 <sup>19</sup>     | United<br>States | Children's<br>hospital | Mixed<br>conditions                                       | Range: 0-<br>18                               | 61 Parents<br>-40 Mothers<br>(incl 2 foster<br>and 1 step)<br>- 21 Fathers | Mixed<br>methods                                             | To examine patient care from hospital<br>staff and family perspectives                                                                                                                | Med  | 1                                       |                                                  |
| Cortezzo<br>2015 <sup>20</sup>   | United<br>States | NICU                   | All neonatal                                              | Range: 1-<br>>14 days                         | 7 Parents<br>- 6 Mothers<br>- 1 Father                                     | Exploratory<br>cross-<br>sectional<br>study                  | To determine the perceptions of end-of-<br>life care practices and experience with<br>infants who have died in the NICU<br>among neonatologists, advanced                             | Med  | 1                                       |                                                  |

| Author<br>Year                 | Country          | <u>Child characteristics</u>      |                                        |                                             |                                                                 | Parent<br>participants              | Study design                                                                                                                                 | Aim  | Summary<br>methodological<br>assessment | Combined<br>data richness<br>/relevance<br>score |
|--------------------------------|------------------|-----------------------------------|----------------------------------------|---------------------------------------------|-----------------------------------------------------------------|-------------------------------------|----------------------------------------------------------------------------------------------------------------------------------------------|------|-----------------------------------------|--------------------------------------------------|
|                                |                  | Setting                           | Condition                              | Age                                         |                                                                 |                                     |                                                                                                                                              |      |                                         |                                                  |
|                                |                  |                                   |                                        |                                             |                                                                 |                                     | practitioners, nurses, and parents, and also to determine perceived areas for improvement and the perceived value of a palliative care team. |      |                                         |                                                  |
| Davies<br>2004 <sup>21</sup>   | United<br>States | Home-<br>based<br>hospice<br>care | Mixed<br>conditions                    | Range:<br>3mths-14<br>yrs                   | 8 Fathers                                                       | Grounded<br>theory                  | To enhance understanding of fathers' experiences with a child who is seriously ill and dies.                                                 | High | 2                                       |                                                  |
| Davies<br>2010 <sup>22</sup>   | United<br>States | Hospital                          | Mixed<br>conditions                    | Mean:<br>4.45 yrs<br>Range: 1<br>day-20 yrs | 36 Parents<br>-25 Mothers<br>- 11 Fathers                       | Grounded<br>theory                  | To learn about experiences of Mexican American and Chinese American families who require pediatric palliative care                           | Med  | 2                                       |                                                  |
| Davies<br>2013 <sup>23</sup>   | United<br>States | Mixed                             | Mixed<br>conditions                    | Range: 0-<br>21 yrs                         | 60 Fathers<br>- 55 Fathers<br>- 3 Step-<br>Fathers<br>- 2 Other | Grounded<br>theory                  | To improve end-of-life care for children and their families by exploring the fathers' experiences                                            | High | 2                                       |                                                  |
| Einaudi<br>2010 <sup>24</sup>  | France           | Perinatal<br>unit                 | Mixed<br>conditions<br>- all perinatal | Range:<br>birth-3<br>mths                   | 12 Parents<br>- 10 Mothers<br>- 2 Fathers                       | Qualitative<br>descriptive<br>study | To understand the parental response to perinatal death by describing the experiences of the families involved                                | Low  | 1                                       |                                                  |
| Flavelle<br>2011 <sup>25</sup> | Canada           | Home<br>Hospital                  | Osteosarcoma                           | 15 yrs                                      | n/a                                                             | Phenomenology<br>case study         | To provide a unified description of an adolescent's experience of living with and dying of cancer                                            | High | 3                                       |                                                  |
| Fortney<br>2020 <sup>26</sup>  | United<br>States | NICU                              | Mixed<br>conditions                    | Mean:<br>40.9 days                          | 46 Parents<br>- 30 Mothers<br>- 16 Fathers                      | Exploratory<br>study                | To examine bereaved parents' perceptions of infant suffering in the NICU                                                                     | High | 2                                       |                                                  |
| Gaab<br>2013 <sup>27</sup>     | New<br>Zealand   | PPC<br>service                    | Mixed<br>conditions                    | Range: 3-<br>18 yrs                         | 19 Parents<br>- 12 Mothers<br>- 5 Fathers                       | Not reported                        | To describe the experiences of a sample of primary caregivers who have children in palliative care.                                          | Med  | 1                                       |                                                  |

| Author<br>Year                  | Country           | Setting                     | Child characteristics                                                              |                                                  |                                            | Parent<br>participants                  | Study design                                                                                                                                                                               | Aim  | Summary<br>methodological<br>assessment | Combined<br>data richness<br>/relevance<br>score |
|---------------------------------|-------------------|-----------------------------|------------------------------------------------------------------------------------|--------------------------------------------------|--------------------------------------------|-----------------------------------------|--------------------------------------------------------------------------------------------------------------------------------------------------------------------------------------------|------|-----------------------------------------|--------------------------------------------------|
|                                 |                   |                             | Condition                                                                          | Age                                              |                                            |                                         |                                                                                                                                                                                            |      |                                         |                                                  |
| Gilmer<br>2013 <sup>28</sup>    | United<br>States  | Hospital                    | Mixed<br>conditions                                                                | Range: 0-<br>14 yrs                              | 15 Parents<br>- 14 Mothers<br>- 1 father   | Not recorded                            | To describe parental satisfaction of their children's care at EOL and to identify parental needs for the development and provision of pediatric palliative care services                   | Med  | 1                                       |                                                  |
| Goldstein<br>2013 <sup>29</sup> | United<br>States  | Not<br>recorded             | Mixed<br>conditions                                                                | Range: 1<br>mth-11 yrs                           | 16 families                                | Qualitative<br>study                    | To explore current involvement of PCPs when their patients face the end of life and bereaved parents' attitudes toward it.                                                                 | High | 2                                       |                                                  |
| Gurková<br>2015 <sup>30</sup>   | Slovakia          | Hospital<br>Home            | Cancer                                                                             | Range: 8-<br>20yrs                               | 5 Parents<br>- 4 Mothers<br>- 1 father     | Qualitative<br>study                    | To illuminate and analyse experience of parents with failed treatment and the death of their child suffering from cancer                                                                   | High | 1                                       |                                                  |
| Hellmann<br>2013 <sup>31</sup>  | Canada            | NICU                        | Gestational<br>Neonates<br>- Withdrawn<br>artificial<br>nutrition and<br>hydration | Age:<br>median 40<br>wks<br>Range: 31-<br>42 wks | 10 Parents                                 | Mixed<br>methods                        | To review the experience of the practice of withdrawal of artificial nutrition and hydration (WANH) and to describe parental perspectives on the process.                                  | Med  | 1                                       |                                                  |
| Higgs<br>2016 <sup>32</sup>     | Australia         | Not<br>recorded             | Spinal muscular<br>atrophy (SMA)<br>type 1                                         | Range: <3<br>mths-12<br>mths                     | 13 Parents<br>- 7 Mothers<br>- 6 Fathers   | Qualitative<br>study                    | To examine parents' perspectives of having a child with SMA type 1, from diagnosis to bereavement,                                                                                         | High | 2                                       |                                                  |
| Johnston<br>2020 <sup>33</sup>  | United<br>States  | Home<br>Hospital            | Cancer                                                                             | Mean: 9.8<br>yrs                                 | 28 Parents<br>- 18 Mothers<br>- 10 Fathers | Not reported                            | To describe bereaved parents' perspectives of high-quality EOL care in pediatric oncology                                                                                                  | High | 2                                       |                                                  |
| Jordan<br>2015 <sup>34</sup>    | United<br>Kingdom | Hospital<br>hospice<br>Home | Mixed<br>conditions                                                                | Range:<br>< 1 yr-18<br>yrs                       | 25 Parents<br>- 16 Mothers<br>- 9 Fathers  | Interpretive<br>qualitative<br>approach | To explore the experiences of parents caring for children with both malignant and non-malignant conditions throughout the entire trajectory of their child's illness and subsequent death. | High | 2                                       |                                                  |

| Author<br>Year                    | Country        | Setting      | Child characteristics                     |                                                  |                                                                        | Parent<br>participants                 | Study design                                                                                                                                                                                 | Aim  | Summary<br>methodological<br>assessment | Combined<br>data richness<br>/relevance<br>score |
|-----------------------------------|----------------|--------------|-------------------------------------------|--------------------------------------------------|------------------------------------------------------------------------|----------------------------------------|----------------------------------------------------------------------------------------------------------------------------------------------------------------------------------------------|------|-----------------------------------------|--------------------------------------------------|
|                                   |                |              | Condition                                 | Age                                              |                                                                        |                                        |                                                                                                                                                                                              |      |                                         |                                                  |
| Kars<br>2011 <sup>35</sup>        | Netherlands    | Home         | Cancer                                    | Range 6<br>mths-16<br>yrs                        | 42 Parents<br>- 22 Mothers<br>- 20 Fathers                             | Interpretative<br>qualitative<br>study | To elucidate parents' experiences when caring at home for their child with incurable cancer and to show how parents give meaning to their experiences throughout the end-of-life (EOL) phase | High | 2                                       |                                                  |
| Kenney<br>2021 <sup>36</sup>      | International  | Not recorded | Cancer                                    | Mean:<br>12.42 yrs<br>Range: 2-<br>25 yrs        | -127 Parents<br>-98 Mothers<br>-29 Fathers                             | Qualitative<br>approach                | To examine family communication and preferred forms of support among bereaved caregivers of children with cancer.                                                                            | High | 2                                       |                                                  |
| Lundqvist<br>2002 <sup>37</sup>   | Sweden         | Hospital     | Infants                                   | Mean 5.6<br>days<br>Range: 15<br>mins-2<br>weeks | 16 Parents<br>- 16 Mothers                                             | Not reported                           | To examine and illuminate mothers' experiences and perceptions of the care given to them at neonatal clinics while facing the threat and the reality of losing their baby                    | High | 3                                       |                                                  |
| McHaffie<br>2001 <sup>38</sup>    | United Kingdom | NICU         | Mixed conditions                          | Range: 0-9<br>mths                               | 108 Parents                                                            | Not reported                           | To explore parents' perceptions of treatment withdrawal and the dying process                                                                                                                | Med  | 2                                       |                                                  |
| Meert<br>2008 <sup>39</sup>       | United States  | PICU         | Mixed conditions                          | Median<br>1.6 yrs                                | 56 Parents<br>- 39 Mothers<br>(incl. 2 legal guardian)<br>- 17 Fathers | Qualitative<br>interview<br>study      | To describe parents' perceptions of their conversations with physicians regarding their child's terminal illness and death in the pediatric intensive care unit (PICU)                       | Med  | 2                                       |                                                  |
| Meert<br>2008 <sup>40</sup>       | United States  | PICU         | Mixed conditions                          | Median:<br>4.5 yrs                               | 33 Parents<br>- 21 Mothers (Incl legal guardian)<br>- 12 Fathers       | Descriptive<br>qualitative<br>study    | To explore parents' environmental needs during their child's hospitalization and death in the PICU.                                                                                          | High | 2                                       |                                                  |
| Mekelenkamp<br>2020 <sup>41</sup> | Netherlands    | Hospital     | All had undergone pediatric hematopoietic | Range:<br><12->16<br>yrs                         | 14 Parents<br>- 7 Mothers<br>- 7 Fathers                               | Qualitative<br>descriptive<br>study    | To gain insight in parental experiences in EOL decision-making in allogeneic pediatric HSCT.                                                                                                 | High | 2                                       |                                                  |

| Author<br>Year                   | Country           | Setting                       | Child characteristics                  |                                                                                       |                                                                                  | Parent<br>participants               | Study design                                                                                                                                                                                                    | Aim  | Summary<br>methodological<br>assessment | Combined<br>data richness<br>/relevance<br>score |
|----------------------------------|-------------------|-------------------------------|----------------------------------------|---------------------------------------------------------------------------------------|----------------------------------------------------------------------------------|--------------------------------------|-----------------------------------------------------------------------------------------------------------------------------------------------------------------------------------------------------------------|------|-----------------------------------------|--------------------------------------------------|
|                                  |                   |                               | Condition                              | Age                                                                                   |                                                                                  |                                      |                                                                                                                                                                                                                 |      |                                         |                                                  |
|                                  |                   |                               | stem cell<br>transplantation<br>(HSCT) |                                                                                       |                                                                                  |                                      |                                                                                                                                                                                                                 |      |                                         |                                                  |
| Meyer<br>2006 <sup>42</sup>      | United<br>States  | PICU                          | Mixed<br>conditions                    | Range: 0-<br>18 yrs                                                                   | 56 Parents<br>- 36 Mothers<br>- 2- Fathers                                       | Qualitative<br>study                 | To identify parents' priorities and<br>recommendations for improving the<br>quality of end-of-life care and<br>communication in the PICU.                                                                       | Med  | 3                                       |                                                  |
| Mitchell<br>2020 <sup>43</sup>   | United<br>Kingdom | Mixed                         | Mixed<br>conditions                    | Median 9<br>yrs<br>Range 5-18<br>yrs                                                  | 19 Parents<br>- 13 Mothers<br>- 6 Fathers                                        | Longitudinal<br>qualitative<br>study | To understand the experiences and<br>perceptions of healthcare services of<br>children with life-limiting and life-<br>threatening conditions and their family<br>members, including palliative care.           | High | 2                                       |                                                  |
| Monterosso<br>2007 <sup>44</sup> | Australia         | Palliative<br>care<br>service | Mixed<br>conditions                    | Age at<br>diagnosis<br>Cancer<br>Mean: 6<br>yrs<br>Non-<br>cancer<br>Mean: 1.8<br>yrs | Phase 1<br>Quant: 129<br>Parents<br>- 103 Mothers<br>Phase 2 Qual:<br>38 Parents | Mixed<br>methods.                    | To obtain feedback from families of<br>children receiving palliative and<br>supportive care about their care needs<br>in hospital and in community settings.                                                    | Low  | 1                                       |                                                  |
| Moro<br>2011 <sup>45</sup>       | United<br>States  | Neonatal                      | Extremely<br>premature                 | Range: 7<br>mths-12<br>years                                                          | 5 Parents<br>- 5 Mothers                                                         | Case study<br>approach               | To examine parent, nurse and physician<br>perspectives regarding how parents<br>make life support decisions for<br>extremely premature infants from the<br>prenatal<br>through end-of-life period are presented | low  | 1                                       |                                                  |
| Neilson<br>2015 <sup>46</sup>    | United<br>Kingdom | Role of<br>GPs                | Cancer                                 | Range: 6-<br>16 yrs                                                                   | 12 Parents<br>- 10 Mothers<br>- 2 Fathers                                        | Qualitative<br>study                 | To examine the role of the general<br>practitioner (GP) in children's oncology<br>palliative care from the perspective of<br>GPs who had cared for a child with                                                 | High | 1                                       |                                                  |

| Author<br>Year                    | Country           | Setting           | Child characteristics                                       |                              |                                                                                  | Parent<br>participants              | Study design                                                                                                                                                                                 | Aim  | Summary<br>methodological<br>assessment | Combined<br>data richness<br>/relevance<br>score |
|-----------------------------------|-------------------|-------------------|-------------------------------------------------------------|------------------------------|----------------------------------------------------------------------------------|-------------------------------------|----------------------------------------------------------------------------------------------------------------------------------------------------------------------------------------------|------|-----------------------------------------|--------------------------------------------------|
|                                   |                   |                   | Condition                                                   | Age                          |                                                                                  |                                     |                                                                                                                                                                                              |      |                                         |                                                  |
|                                   |                   |                   |                                                             |                              |                                                                                  |                                     | cancer receiving palliative care at home and bereaved parents.                                                                                                                               |      |                                         |                                                  |
| Pector<br>2004 <sup>47</sup>      | United<br>States  | Perinatal<br>NICU | Multiple<br>gestations<br>(except 1)<br>Mixed<br>conditions | Not<br>reported              | 71 Parents<br>- 67 Mothers<br>- 4 Fathers                                        | Grounded<br>theory                  | To assess the experiences of bereaved parents of multiples with resuscitation and life-support discussions, the death process, and conversations with health-care professionals about death. | Med  | 2                                       |                                                  |
| PintoTaylor<br>2020 <sup>48</sup> | United<br>States  | Not<br>recorded   | LLCs                                                        | Median: 2<br>yrs             | 9 caregivers                                                                     | Grounded<br>theory                  | To explore the decision-making factors for caregivers of children with life-limiting illness through the use of qualitative interviews and thematic analysis.                                | High | 2                                       |                                                  |
| Popejoy<br>2015 <sup>49</sup>     | United<br>Kingdom | Not<br>recorded   | LLC or LTCs                                                 | Range: 3-<br>15 yrs          | Phase 1<br>Quant: 129<br>Parents<br>- 103 Mothers<br>Phase 2 Qual:<br>38 Parents | Exploratory<br>study                | To understand the 'lived experience' of parents throughout the process of making and revising end of life care decisions for their child.                                                    | High | 2                                       |                                                  |
| Price<br>2011 <sup>50</sup>       | United<br>Kingdom | Not<br>recorded   | Mixed<br>conditions                                         | Range: 2<br>mths-20<br>yrs   | 25 Parents<br>- 16 Mothers<br>- 9 Fathers                                        | Qualitative<br>study                | To explore parents' experiences of caring for children with both malignant and non-malignant conditions throughout the entire trajectory of their child's illness and subsequent death       | High | 2                                       |                                                  |
| Price<br>2012 <sup>51</sup>       | United<br>Kingdom | Not<br>recorded   | Mixed<br>conditions                                         | Range: 2<br>mths-20<br>yrs   | 25 Parents<br>- 16 Mothers<br>- 9 Fathers                                        | Qualitative<br>study                | To examine the experiences of bereaved parents concerning the care provided to children who died from cancer compared to those who died from a non-malignant condition                       | High | 2                                       |                                                  |
| Pritchard<br>2009 <sup>52</sup>   | United<br>States  | Hospital          | Cancer                                                      | Range: 2<br>mths-19.6<br>yrs | 42 Parents<br>- 39 Mothers<br>- 3 Fathers                                        | Descriptive<br>exploratory<br>study | To identify how these parents perceived when their child's death would occur                                                                                                                 | Med  | 2                                       |                                                  |



| Author<br>Year                   | Country           | Setting                                | Child characteristics                             |                                          |                                                    | Parent<br>participants                          | Study design                                                                                                                                                                                                                                                                                                | Aim  | Summary<br>methodological<br>assessment | Combined<br>data richness<br>/relevance<br>score |
|----------------------------------|-------------------|----------------------------------------|---------------------------------------------------|------------------------------------------|----------------------------------------------------|-------------------------------------------------|-------------------------------------------------------------------------------------------------------------------------------------------------------------------------------------------------------------------------------------------------------------------------------------------------------------|------|-----------------------------------------|--------------------------------------------------|
|                                  |                   |                                        | Condition                                         | Age                                      |                                                    |                                                 |                                                                                                                                                                                                                                                                                                             |      |                                         |                                                  |
| Reilly<br>2010 <sup>53</sup>     | United<br>Kingdom | Home<br>Hospice<br>Hospital            | Intellectual<br>disability<br>Mixed<br>conditions | Range: 23<br>mths-18<br>yrs              | 9 Parents<br>- 9 Mothers                           | Interpretative<br>phenomenolo<br>gical analysis | To focus on the experiences of mothers who lose a child with an intellectual disability in the UK, to provide a rich description of their bereavement experiences, and offer an interpretation of these experiences in terms of issues relevant to service providers, researchers and medical professionals | High | 2                                       |                                                  |
| Rini<br>2007 <sup>54</sup>       | United<br>States  | Hospital                               | Mixed<br>conditions                               | Range: 10<br>days-20 yrs                 | 11 Parents<br>- 9 Mothers<br>- 2 Fathers           | Descriptive<br>design                           | To describe the presence (or the absence) and the role of anticipatory mourning in parents who recently experienced the death of a hospitalized child and to determine if there were consistent factors that they described as helpful or detrimental to them during this process                           | Med  | 2                                       |                                                  |
| Robert<br>2012 <sup>55</sup>     | United<br>States  | Hospital                               | Cancer                                            | Mean: 15<br>yrs                          | 14 Parents<br>- 7 Mothers<br>- 7 Fathers           | Focus group<br>methodology                      | To understand the needs and experiences of bereaved parents whose child had received care at one National Cancer Institute-designated comprehensive cancer center                                                                                                                                           | High | 3                                       |                                                  |
| Schutze<br>2021 <sup>56</sup>    | Germany           | Specialised<br>palliative<br>care team | Life limiting<br>conditions                       | Range: 4<br>mths-17<br>yrs               | 13 Parents<br>- 9 Mothers<br>- 4 Fathers           | Not reported                                    | To explore parents' experiences and their demands of collaboration with SOPPC (specialised outpatient pediatric palliative care) team                                                                                                                                                                       | High | 1                                       |                                                  |
| Shelkowitz<br>2015 <sup>57</sup> | United<br>States  | Hospital                               | Neonatal                                          | Gestationa<br>l age<br>Mean:<br>28.6 wks | 28 Parents<br>-27 Mothers<br>- 1 joint<br>response | Cross-<br>sectional<br>survey study             | To explore the personal care options offered to parents as well as parental perceptions of the counseling they received regarding these options at their infants' end of life                                                                                                                               | Med  | 1                                       |                                                  |

| Author<br>Year                 | Country          | Setting         | Child characteristics                                                                                       |                                                    |                                                                                                              | Parent<br>participants                | Study design                                                                                                                                                                                                                                      | Aim  | Summary<br>methodological<br>assessment | Combined<br>data richness<br>/relevance<br>score |
|--------------------------------|------------------|-----------------|-------------------------------------------------------------------------------------------------------------|----------------------------------------------------|--------------------------------------------------------------------------------------------------------------|---------------------------------------|---------------------------------------------------------------------------------------------------------------------------------------------------------------------------------------------------------------------------------------------------|------|-----------------------------------------|--------------------------------------------------|
|                                |                  |                 | Condition                                                                                                   | Age                                                |                                                                                                              |                                       |                                                                                                                                                                                                                                                   |      |                                         |                                                  |
| Snaman<br>2016 <sup>58</sup>   | United<br>States | Hospital        | Cancer                                                                                                      | Not<br>reported                                    | 11 Parents<br>- 9 Mothers<br>- 2 Fathers                                                                     | Not reported                          | To further characterize the grief journey of parents whose child died from cancer in order to better identify parents who can benefit from additional bereavement support and design strategies to improve bereavement services for these parents | Med  | 2                                       |                                                  |
| Steele<br>2005 <sup>59</sup>   | United<br>States | Hospice         | Mixed<br>conditions                                                                                         | Not<br>reported                                    | Interviews: 36<br>Parents<br>Survey: 105<br>Parents<br>EoL Qs: 39<br>Parents<br>- 24 Mothers<br>- 15 Fathers | Programme<br>evaluation               | To evaluate the Canuck Place children's hospice program. This article reports only on the end-of-life care component.                                                                                                                             | Med  | 1                                       |                                                  |
| Sullivan<br>2014 <sup>60</sup> | Australia        | Not<br>reported | Mixed<br>conditions                                                                                         | Range: 3<br>mths-10.5<br>years<br>Mean: 3.5<br>yrs | 25 Parents<br>- 19 Mothers<br>- 5 father                                                                     | Exploratory<br>descriptive<br>study   | To examine parents' views and experiences of end-of-life decision-making                                                                                                                                                                          | High | 2                                       |                                                  |
| Sullivan<br>2020 <sup>61</sup> | Australia        | Not<br>reported | Mixed<br>conditions                                                                                         | Range: 3<br>mths-12<br>yrs                         | 25 Parents<br>- 19 Mothers<br>- 5 Fathers                                                                    | Exploratory<br>descriptive<br>study   | To examine parents' views and experiences of ELDM for their child                                                                                                                                                                                 | High | 1                                       |                                                  |
| Tan<br>2012 <sup>62</sup>      | United<br>States | Hospital        | Mixed<br>conditions<br>- extreme<br>prematurity<br>- congenital<br>heart diseases<br>- genetic<br>disorders | Range: 23-<br>108 wks                              | 14 Parents<br>- 7 Mothers<br>- 7 Fathers                                                                     | Longitudinal<br>prospective<br>design | To prospectively describe the bereavement experience of parents whose infants die in acute care settings with a complex chronic condition                                                                                                         | Med  | 2                                       |                                                  |

| Author<br>Year                      | Country           | <u>Child characteristics</u>        |                      |                                          |                                            | Parent<br>participants                 | Study design                                                                                                                                                                             | Aim  | Summary<br>methodological<br>assessment | Combined<br>data richness<br>/relevance<br>score |
|-------------------------------------|-------------------|-------------------------------------|----------------------|------------------------------------------|--------------------------------------------|----------------------------------------|------------------------------------------------------------------------------------------------------------------------------------------------------------------------------------------|------|-----------------------------------------|--------------------------------------------------|
|                                     |                   | Setting                             | Condition            | Age                                      |                                            |                                        |                                                                                                                                                                                          |      |                                         |                                                  |
| Thienprayoon<br>2016 <sup>63</sup>  | United<br>States  | Hospice<br>care                     | Cancer               | Range: <2-<br>18 yrs                     | 31 Parents<br>- 18 Mothers<br>- 13 Fathers | Qualitative<br>pilot                   | To explore parental perspectives of the hospice experience in children with cancer, and to explore how race ethnicity impacts this experience                                            | High | 2                                       |                                                  |
| Tutelman<br>2021 <sup>64</sup>      | United<br>States  | Home<br>based<br>palliative<br>care | Mixed<br>conditions  | Mean:<br>10.5 yrs<br>Range: 4-<br>18 yrs | 34 Parents<br>- 24 Mothers<br>- 10 Fathers | Qualitative<br>descriptive<br>design   | To explore the concerns of parents who have a child in home-based PPC.                                                                                                                   | High | 1                                       |                                                  |
| Verberne<br>2019 <sup>65</sup>      | Netherland<br>s   | Pediatric<br>Palliative<br>Care     | Mixed<br>conditions  | Range: 0-<br>18 yrs                      | 32 Parents<br>- 24 Mothers<br>- 18 Fathers | Interpretative<br>qualitative<br>study | To examine experiences and coping strategies from the perspective of parents caring for a child receiving PPC                                                                            | High | 2                                       |                                                  |
| Weidner<br>2011 <sup>66</sup>       | United<br>States  | Hospital<br>Home                    | Mixed<br>conditions  | Not<br>reported                          | 29 Parents<br>- 20 Mothers<br>- 9 Fathers  | Qualitative<br>study                   | To identify and define the dimensions of pediatric end-of-life (EOL) care that are important to parents.                                                                                 | High | 3                                       |                                                  |
| Wiener<br>2020 <sup>67</sup>        | United<br>States  | Mixed                               | Cancer               | Mean: 12<br>yrs                          | 127 Parents<br>- 98 Mothers                | Retrospective<br>Survey                | Aimed to assess the degree to which parents felt prepared to address their child's medical problems and emotional needs at the EoL, as well as the implications from lack of preparation | Low  | 1                                       |                                                  |
| Yorke<br>2011 <sup>68</sup>         | United<br>States  | PICU                                | Mixed<br>conditions  | Range: 0-<br>20 yrs                      | 23 Parents (or<br>Grandparents<br>)        | Mixed<br>methods                       | To explore parents' memories of having a child die in the PICU.                                                                                                                          | Med  | 2                                       |                                                  |
| Zaal-Schuller<br>2016 <sup>69</sup> | Netherland<br>s   | Not<br>reported                     | Severely<br>disabled | Range: 0-<br>19 yrs                      | 17 Parents<br>- 14 Mothers<br>- 3 Fathers  | Qualitative,<br>retrospective<br>study | To investigate the experiences of the parents and the involved physician during the end-of-life decision-making (EoLDM) process for children with PIMD                                   | High | 2                                       |                                                  |
| Zelcer<br>2010 <sup>70</sup>        | United<br>Kingdom | Hospital                            | Brain Tumors         | Range: 1-<br>19 yrs                      | 25 Parents<br>- 16 Mothers<br>- 9 Fathers  | Qualitative<br>thematic<br>analysis    | To explore the end-of-life experience of children with brain tumors and their families.                                                                                                  | High | 2                                       |                                                  |

1. Armentrout D. Living with grief following removal of infant life support: parents' perspectives. *Critical Care Nursing Clinics of North America* 2009; 21: 253-265. DOI: 10.1016/j.ccell.2009.01.003.
2. Armentrout D. Holding a place: parents' lives following removal of infant life support. *Newborn Infant Nurs Rev* 2007; 7: e3-8.
3. Beecham E, Oostendorp L, Crocker J, et al. Keeping all options open: Parents' approaches to advance care planning. *Health Expectations* 2017; 20: 675-684. DOI: 10.1111/hex.12500.
4. Bogetz JF, Revette A, Rosenberg AR, et al. "I Could Never Prepare for Something Like the Death of My Own Child": Parental Perspectives on Preparedness at End of Life for Children With Complex Chronic Conditions. *Journal of Pain & Symptom Management* 2020; 60: 1154-1154. DOI: 10.1016/j.jpainsymman.2020.06.035.
5. Bogetz JF, Revette A and DeCoursey DD. Clinical Care Strategies That Support Parents of Children With Complex Chronic Conditions. *Pediatric critical care medicine : a journal of the Society of Critical Care Medicine and the World Federation of Pediatric Intensive and Critical Care Societies* 2021; 05. DOI: <http://dx.doi.org/10.1097/PCC.0000000000002726>.
6. Branchett K and Stretton J. Neonatal palliative and end of life care: what parents want from professionals. *Journal of Neonatal Nursing* 2012; 18: 40-44. DOI: 10.1016/j.jnn.2012.01.009.
7. Brenner M, Connolly M, Cawley D, et al. Family and healthcare professionals' perceptions of a pilot hospice at home programme for children: a qualitative study. *BMC Palliative Care* 2016; 15: 1-8. DOI: 10.1186/s12904-016-0161-0.
8. Brinchmann BS, Førde R and Nortvedt P. What matters to the parents? A qualitative study of parents' experiences with life-and-death decisions concerning their premature infants. *Nursing Ethics* 2002; 9: 388-404. DOI: 10.1191/0969733002ne523oa.
9. Brosig CL, Pierucci RL, Kupst MJ, et al. Infant end-of-life care: the parents' perspective. *Journal of Perinatology* 2007; 27: 510-516.
10. Brouwer M, Maeckelberghe ELM, van der Heide A, et al. Barriers in care for children with life-threatening conditions: a qualitative interview study in the Netherlands. *BMJ Open* 2020; 10: e035863. DOI: <http://dx.doi.org/10.1136/bmjopen-2019-035863>.
11. Butler AE, Hall H and Copnell B. The changing nature of relationships between parents and healthcare providers when a child dies in the paediatric intensive care unit. *Journal of Advanced Nursing* 2018; 74: 89-99. DOI: 10.1111/jan.13401.
12. Butler AE, Copnell B and Hall H. When a Child Dies in the PICU: Practice Recommendations From a Qualitative Study of Bereaved Parents\*. *Pediatric Critical Care Medicine* 2019; 20: e447-e451. DOI: 10.1097/pcc.0000000000002040.
13. Bužgová R and Páleníková A. LIVED EXPERIENCE OF PARENTS OF CHILDREN WITH LIFE-LIMITING AND LIFETHREATENING DISEASE. *Central European Journal of Nursing & Midwifery* 2015; 6: 209-217. DOI: 10.15452/CEJNM.2015.06.0005.
14. Cacciatore J, Thieleman K, Lieber AS, et al. The Long Road to Farewell: The Needs of Families With Dying Children. *Omega: Journal of Death & Dying* 2019; 78: 404-420. DOI: 10.1177/0030222817697418.
15. Caeymaex L, Speranza M, Vasilescu C, et al. Living with a crucial decision: A qualitative study of parental narratives three years after the loss of their newborn in the NICU. *PLoS ONE* 2011; 6. DOI: <http://dx.doi.org/10.1371/journal.pone.0028633>.
16. Coats H and Rishel CJ. Journeys of Hope. *Journal of Hospice & Palliative Nursing* 2016; 18: 436-442. DOI: 10.1097/NJH.000000000000269.
17. Collins A, Hennessy-Anderson N, Hosking S, et al. Lived experiences of parents caring for a child with a life-limiting condition in Australia: A qualitative study. *Palliative Medicine* 2016; 30: 950-959. DOI: 10.1177/0269216316634245.

18. Contro N, Larson J, Scofield S, et al. Family perspectives on the quality of pediatric palliative care. *Archives of Pediatrics & Adolescent Medicine* 2002; 156: 14-19. DOI: 10.1001/archpedi.156.1.14.
19. Contro NA, Larson J, Scofield S, et al. Hospital staff and family perspectives regarding quality of pediatric palliative care. *Pediatrics* 2004; 114: 1248-1252. DOI: 10.1542/peds.2003-0857-l.
20. Cortezzo DE, Sanders MR, Brownell EA, et al. End-of-Life Care in the Neonatal Intensive Care Unit: Experiences of Staff and Parents. *American Journal of Perinatology* 2015; 32: 713-724. DOI: 10.1055/s-0034-1395475.
21. Davies B, Gudmundsdottir M, Worden B, et al. 'Living in the dragon's shadow' fathers' experiences of a child's life-limiting illness. *Death Studies* 2004; 28: 111-135. DOI: 10.1080/07481180490254501.
22. Davies B, Contro N, Larson J, et al. Culturally-sensitive information-sharing in pediatric palliative care. *Pediatrics* 2010; 125: e859-865. DOI: 10.1542/peds.2009-0722.
23. Davies B, Baird J and Gudmundsdottir M. Moving family-centered care forward: Bereaved fathers' perspectives. *Journal of Hospice & Palliative Nursing* 2013; 15: 01. DOI: <https://dx.doi.org/10.1097/NJH.0b013e3182765a2a>.
24. Einaudi MA, Le Coz P, Malzac P, et al. Parental experience following perinatal death: Exploring the issues to make progress. *European Journal of Obstetrics and Gynecology and Reproductive Biology* 2010; 151: 143-148. DOI: <http://dx.doi.org/10.1016/j.ejogrb.2010.04.003>.
25. Flavelle SC. Experience of an adolescent living with and dying of cancer. *Archives of Pediatrics and Adolescent Medicine* 2011; 165: 28-32. DOI: <http://dx.doi.org/10.1001/archpediatrics.2010.249>.
26. Fortney CA, Baughcum AE, Moscato EL, et al. Bereaved Parents' Perceptions of Infant Suffering in the NICU. *Journal of Pain & Symptom Management* 2020; 59: 1001-1008. DOI: 10.1016/j.jpainsymman.2019.12.007.
27. Gaab E, Owens RG and MacLeod R. Primary caregivers' experiences living with children involved in pediatric palliative care in New Zealand. *Vulnerable Children & Youth Studies* 2013; 8: 1-9. DOI: 10.1080/17450128.2012.720396.
28. Gilmer MJ, Foster TL, Bell CJ, et al. Parental Perceptions of Care of Children at End of Life. *American Journal of Hospice & Palliative Medicine* 2013; 30: 53-58. DOI: 10.1177/1049909112440836.
29. Goldstein R and Rimer KP. Parents' Views of Their Child's End-of-Life Care: Subanalysis of Primary Care Involvement. *Journal of Palliative Medicine* 2013; 16: 198-202. DOI: 10.1089/jpm.2012.0269.
30. Gurková E, Andraščíková I and Čáp J. PARENTS' EXPERIENCE WITH A DYING CHILD WITH CANCER IN PALLIATIVE CARE. *Central European Journal of Nursing & Midwifery* 2015; 6: 201-208. DOI: 10.15452/CEJNM.2015.06.0004.
31. Hellmann J, Williams C, Ives-Baine L, et al. Withdrawal of artificial nutrition and hydration in the Neonatal Intensive Care Unit: parental perspectives. *Archives of Disease in Childhood -- Fetal & Neonatal Edition* 2013; 98: F21-25. DOI: 10.1136/fetalneonatal-2012-301658.
32. Higgs EJ, McClaren BJ, Sahhar MAR, et al. 'A short time but a lovely little short time': Bereaved parents' experiences of having a child with spinal muscular atrophy type 1. *Journal of Paediatrics & Child Health* 2016; 52: 40-46. DOI: 10.1111/jpc.12993.
33. Johnston EE, Molina J, Martinez I, et al. Bereaved parents' views on end-of-life care for children with cancer: Quality marker implications. *Cancer (0008543X)* 2020; 126: 3352-3359. DOI: 10.1002/cncr.32935.

34. Jordan J, Price J and Prior L. Disorder and disconnection: parent experiences of liminality when caring for their dying child. *Sociology of Health & Illness* 2015; 37: 839-855. DOI: 10.1111/1467-9566.12235.
35. Kars MC, Grypdonck MHF and van Delden JJM. Being a Parent of a Child With Cancer Throughout the End-of-Life Course. *Oncology Nursing Forum* 2011; 38: E260-271. DOI: 10.1188/11.ONF.E260-E271.
36. Kenney AE, Bedoya SZ, Gerhardt CA, et al. End of life communication among caregivers of children with cancer: A qualitative approach to understanding support desired by families. *Palliative & Supportive Care* 2021: 1-8. DOI: <http://dx.doi.org/10.1017/S1478951521000067>.
37. Lundqvist A, Nilstun T and Dykes AK. Both empowered and powerless: Mothers' experiences of professional care when their newborn dies. *Birth-Issues in Perinatal Care* 2002; 29: 192-199. DOI: 10.1046/j.1523-536X.2002.00187.x.
38. McHaffie HE, Lyon AJ, Fowlie PW, et al. Lingering death after treatment withdrawal in the neonatal intensive care unit. *Archives of Disease in Childhood -- Fetal & Neonatal Edition* 2001; 85: F8-12. DOI: 10.1136/fn.85.1.f8.
39. Meert KL, Eggly S, Pollack M, et al. Parents' perspectives on physician-parent communication near the time of a child's death in the pediatric intensive care unit. *Pediatric Critical Care Medicine* 2008; 9: 2-7. DOI: 10.1097/01.PCC.0000298644.13882.88.
40. Meert KL, Briller SH, Schim SM, et al. Exploring parents' environmental needs at the time of a child's death in the pediatric intensive care unit. *Pediatric Critical Care Medicine* 2008; 9: 623-628. DOI: 10.1097/PCC.0b013e31818d30d5.
41. Mekelenkamp H, Lankester AC, Bierings MB, et al. Parental experiences in end-of-life decision-making in allogeneic pediatric stem cell transplantation: "Have I been a good parent?". *Pediatric Blood & Cancer* 2020; 67: 1-8. DOI: 10.1002/pbc.28229.
42. Meyer EC, Ritholz MD, Burns JP, et al. Improving the quality of end-of-life care in the pediatric intensive care unit: parents' priorities and recommendations. *Pediatrics* 2006; 117: 649-657. DOI: 10.1542/peds.2005-0144.
43. Mitchell S, Slowther AM, Coad J, et al. Experiences of healthcare, including palliative care, of children with life-limiting and life-threatening conditions and their families: A longitudinal qualitative investigation. *Archives of Disease in Childhood* 2020; (no pagination). DOI: <http://dx.doi.org/10.1136/archdischild-2020-320189>.
44. Monterosso L, Kristjanson LJ, Aoun S, et al. Supportive and palliative care needs of families of children with life-threatening illnesses in Western Australia: evidence to guide the development of a palliative care service. *Palliative Medicine* 2007; 21: 689-696.
45. Moro TT, Kavanaugh K, Savage TA, et al. Parent decision making for life support for extremely premature infants: from the prenatal through end-of-life period. *Journal of Perinatal & Neonatal Nursing* 2011; 25: 52-60.
46. Neilson SJ, Gibson F and Greenfield SM. Pediatric Oncology Palliative Care: Experiences of General Practitioners and Bereaved Parents. *Journal of Palliative Care & Medicine* 2015; 5: 214.
47. Pector EA. Views of bereaved multiple-birth parents on life support decisions, the dying process, and discussions surrounding death. *Journal of Perinatology* 2004; 24: 4-10. DOI: 10.1038/sj.jp.7211001.
48. Pinto Taylor E and Doolittle B. Caregiver Decision-Making for Terminally Ill Children: A Qualitative Study. *Journal of Palliative Care* 2020; 35: 161-166. DOI: 10.1177/0825859719885947.
49. Popejoy E. Parents' experiences of care decisions about children with life-limiting illnesses. *Nursing Children & Young People* 2015; 27: 20-24. DOI: 10.7748/ncyp.27.8.20.s23.

50. Price J, Jordan J, Prior L, et al. Living through the death of a child: A qualitative study of bereaved parents' experiences. *International Journal of Nursing Studies* 2011; 48: 1384-1392. DOI: 10.1016/j.ijnurstu.2011.05.006.
51. Price J, Jordan J, Prior L, et al. Comparing the needs of families of children dying from malignant and non-malignant disease: an in-depth qualitative study. *BMJ supportive & palliative care* 2012; 2: 127-132. DOI: <http://dx.doi.org/10.1136/bmjspcare-2011-000104>.
52. Pritchard M, Srivastava DK, Okuma JO, et al. Bereaved parents' perceptions about when their child's cancer-related death would occur. *Journal of Pain & Symptom Management* 2009; 38: 561-567. DOI: 10.1016/j.jpainsymman.2009.01.005.
53. Reilly D, Huws J, Hastings R, et al. Life and Death of a Child With Down Syndrome and a Congenital Heart Condition: Experiences of Six Couples. *Intellectual and Developmental Disabilities* 2010; 48: 403-416. DOI: 10.1352/1934-9556-48.6.403.
54. Rini A and Loriz L. Anticipatory mourning in parents with a child who dies while hospitalized. *Journal of Pediatric Nursing* 2007; 22: 272-282. DOI: 10.1016/j.pedn.2006.08.008.
55. Robert R, Zhukovsky DS, Mauricio R, et al. Bereaved Parents' Perspectives on Pediatric Palliative Care. *Journal of Social Work in End-of-Life & Palliative Care* 2012; 8: 316-338. DOI: 10.1080/15524256.2012.732023.
56. Schutze D, Engler F, Ploeger C, et al. Specialised outpatient paediatric palliative care team-parent collaboration: narrative interviews with parents. *BMJ supportive & palliative care* 2021; 05. DOI: <http://dx.doi.org/10.1136/bmjspcare-2020-002576>.
57. Shelkowitz E, Vessella SL, O'Reilly P, et al. Counseling for personal care options at neonatal end of life: A quantitative and qualitative parent survey Psychosocial. *BMC Palliative Care* 2015; 14. DOI: <http://dx.doi.org/10.1186/s12904-015-0063-6>.
58. Snaman JM, Kaye EC, Torres C, et al. Parental Grief Following the Death of a Child from Cancer: The Ongoing Odyssey. *Pediatric Blood & Cancer* 2016; 63: 1594-1602. DOI: 10.1002/pbc.26046.
59. Steele R, Davies B, Collins JB, et al. End-of-life care in a children's hospice program. *Journal of Palliative Care* 2005; 21: 5-11.
60. Sullivan J, Monagle P and Gillam L. What parents want from doctors in end-of-life decision-making for children. *Archives of Disease in Childhood* 2014; 99: 216-220. DOI: 10.1136/archdischild-2013-304249.
61. Sullivan JE, Gillam LH and Monagle PT. After an end-of-life decision: Parents' reflections on living with an end-of-life decision for their child. *Journal of Paediatrics & Child Health* 2020; 56: 1060-1065. DOI: 10.1111/jpc.14816.
62. Tan AJN, Tiew LH and Shorey S. Experiences and needs of parents of palliative paediatric oncology patients: A meta-synthesis. *Eur J Cancer Care (Engl)* 2021; 30: e13388. 2020/12/19. DOI: 10.1111/ecc.13388.
63. Thienprayoon R, Marks E, Funes M, et al. Perceptions of the Pediatric Hospice Experience among English- and Spanish-Speaking Families. *Journal of Palliative Medicine* 2016; 19: 30-41. DOI: 10.1089/jpm.2015.0137.
64. Tutelman PR, Lipak KG, Adewumi A, et al. Concerns of Parents With Children Receiving Home-Based Pediatric Palliative Care. *Journal of Pain and Symptom Management* 2021; 61: 705-712. DOI: <http://dx.doi.org/10.1016/j.jpainsymman.2020.09.007>.
65. Verberne LM, Kars MC, Schouten-van Meeteren AYN, et al. Parental experiences and coping strategies when caring for a child receiving paediatric palliative care: a qualitative study. *European Journal of Pediatrics* 2019; 178: 1075-1085. DOI: 10.1007/s00431-019-03393-w.
66. Weidner NJ, Cameron M, Lee RC, et al. End-of-life care for the dying child: what matters most to parents. *Journal of Palliative Care* 2011; 27: 279-286.

67. Wiener L, Tager J, Mack J, et al. Helping parents prepare for their child's end of life: A retrospective survey of cancer-bereaved parents. *Pediatric Blood & Cancer* 2020; 67: N.PAG-N.PAG. DOI: 10.1002/pbc.27993.
68. Yorke D. Parents' memories of having a child die in the PICU. *CONNECT: The World of Critical Care Nursing* 2011; 8: 97-102. DOI: 10.1891/1748-6254.8.3.97.
69. Zaal-Schuller IH, Willems DL, Ewals FVPM, et al. How parents and physicians experience end-of-life decision-making for children with profound intellectual and multiple disabilities. *Research in Developmental Disabilities* 2016; 59: 283-293. DOI: 10.1016/j.ridd.2016.09.012.
70. Zelcer S, Cataudella D, Cairney AE, et al. Palliative care of children with brain tumors: a parental perspective. *Archives of Pediatrics & Adolescent Medicine* 2010; 164: 225-230. DOI: 10.1001/archpediatrics.2009.284.
