# Supplementary material for: Understanding parent experiences of end-of-life care for children: A systematic review and qualitative evidence synthesis
Source: PubMed Central journal article supplement — Palliat Med. 2022 Dec 22;37(2):178–202. doi: 10.1177/02692163221144084 (PMC9896294; doi:10.1177/02692163221144084), 2022-12-22
Supplement: sj-pdf-3-pmj-10.1177_02692163221144084.pdf [file sj-pdf-3-pmj-10.1177_02692163221144084.pdf]

Supplementary Table 3: Detail of CASP appraisal of sampled papers

| Author and year | Clear statement of aims | Appropriate qualitative methodology | Appropriate design to meet research aims | Clear consistent and coherent theoretical underpinnings | Recruitment strategy appropriate to research aims | Data collected in a way that addressed the research issue? | Considered relationship between researcher and participants | Considered ethical issues | Sufficiently rigorous data analysis | Clear statement of findings | Research value                                                 | Summary methodological assessment |
|-----------------|-------------------------|-------------------------------------|------------------------------------------|---------------------------------------------------------|---------------------------------------------------|------------------------------------------------------------|-------------------------------------------------------------|---------------------------|-------------------------------------|-----------------------------|----------------------------------------------------------------|-----------------------------------|
| Abraham 2017    | Yes                     | Yes                                 | Yes                                      | Yes                                                     | Yes                                               | Yes                                                        | Yes                                                         | Yes                       | Yes                                 | Yes                         | Clear discussion of findings in relation to existing knowledge | No or very minor concerns         |
| Baughcum 2017   | Yes                     | Yes                                 | Yes                                      | Somewhat                                                | Yes                                               | Yes                                                        | Can't tell                                                  | Yes                       | Yes                                 | Yes                         | Clear discussion of finding in relation to existing model      | Minor concerns                    |
| Brooten 2013    | Yes                     | Yes                                 | Yes                                      | Can't tell                                              | Yes                                               | Yes                                                        | Somewhat                                                    | Yes                       | Somewhat                            | Yes                         | Clear clinical implications                                    | Minor concerns                    |
| Butler 2018 a   | Yes                     | Yes                                 | Yes                                      | Yes                                                     | Yes                                               | Yes                                                        | Yes                                                         | Yes                       | Yes                                 | Yes                         | Clear discussion of contributio                                | No or very minor concerns         |

|                 |     |     |     |            |     |     |     |     |          |          |     |                                                          |                           |
|-----------------|-----|-----|-----|------------|-----|-----|-----|-----|----------|----------|-----|----------------------------------------------------------|---------------------------|
|                 |     |     |     |            |     |     |     |     |          |          |     | ns including unique findings                             |                           |
| Butler 2018 b   | Yes | Yes | Yes | Yes        | Yes | Yes | Yes | Yes | Yes      | Yes      | Yes | Discussion of implications                               | No or very minor concerns |
| Currie 2016     | Yes | Yes | Yes | Yes        | Yes | Yes | Yes | Yes | Yes      | Yes      | Yes | Suggestions of implications for practise section         | No or very minor concerns |
| Davies 2005     | Yes | Yes | Yes | Yes        | Yes | Yes | Yes | Yes | Yes      | Yes      | Yes | Discussion of implications                               | No or very minor concerns |
| Falkenburg 2016 | Yes | Yes | Yes | Can't tell | Yes | Yes | Yes | Yes | Yes      | Yes      | Yes | Discussion of findings in relation to existing knowledge | No or very minor concerns |
| Falkenburg 2018 | Yes | Yes | Yes | Can't tell | Yes | Yes | Yes | Yes | Yes      | Yes      | Yes | Makes recommendations for medical education pro-grammes  | No or very minor concerns |
| Hannan 2005     | Yes | Yes | Yes | Yes        | Yes | Yes | Yes | Yes | Somewhat | Somewhat |     | Discussion of contrib-                                   | Minor concerns            |

|                         |     |     |     |            |          |          |            |     |     |     |     |                                                                      |                           |
|-------------------------|-----|-----|-----|------------|----------|----------|------------|-----|-----|-----|-----|----------------------------------------------------------------------|---------------------------|
|                         |     |     |     |            |          |          |            |     |     |     |     | ution to research                                                    |                           |
| Heller 2005             | Yes | Yes | Yes | Yes        | Yes      | Yes      | Somewhat   | Yes | Yes | Yes | Yes | Clear set of benefits outline for care continuity                    | No or very minor concerns |
| Hendricks-Ferguson 2007 | Yes | Yes | Yes | Yes        | Somewhat | Somewhat | Can't tell | Yes | Yes | Yes | Yes | Discussion of contribution to research and implications for practice | Minor concerns            |
| Hendriks 2017           | Yes | Yes | Yes | Yes        | Yes      | Yes      | Can't tell | Yes | Yes | Yes | Yes | Suggestions for further research                                     | No or very minor concerns |
| Lamiani 2013            | Yes | Yes | Yes | Yes        | Yes      | Yes      | Yes        | Yes | Yes | Yes | YEs | Suggests key messages for practise                                   | No or very minor concerns |
| Lord 2020               | Yes | Yes | Yes | Can't tell | Yes      | Yes      | Yes        | Yes | Yes | Yes | Yes | Discussion of findings in relation to existing knowledge             | No or very minor concerns |
| Mitchell 2019           | Yes | Yes | Yes | Yes        | Yes      | Yes      | Can't tell | Yes | Yes | Yes | Yes | Comparison with existing                                             | No or very minor concerns |

|                 |     |     |     |            |          |     |            |     |     |     |     |                                                                           |                           |
|-----------------|-----|-----|-----|------------|----------|-----|------------|-----|-----|-----|-----|---------------------------------------------------------------------------|---------------------------|
|                 |     |     |     |            |          |     |            |     |     |     |     | literature, recommendations for practise and further research             |                           |
| Monterosso 2008 | Yes | Yes | Yes | Yes        | Somewhat | Yes | Can't tell | Yes | Yes | Yes | Yes | Comparison with existing literature, recommendations for further research | Minor concerns            |
| Papadatou 2021  | Yes | Yes | Yes | yes        | Yes      | Yes | Yes        | Yes | Yes | Yes | Yes | Discussion of contribution to research and implications for practice      | No or very minor concerns |
| Rapoport 2013   | Yes | Yes | Yes | Yes        | Yes      | Yes | Can't tell | Yes | Yes | YEs | Yes | First study to look at parental perceptions of withdrawing nutrition      | No or very minor concerns |
| Sedig 2020      | Yes | Yes | Yes | Can't tell | Yes      | Yes | No         | Yes | Yes | Yes | Yes | Considers future implications with some comparison                        | Minor concerns            |

|               |     |     |     |            |     |     |            |     |     |     |     |                                                                                                             |                           |
|---------------|-----|-----|-----|------------|-----|-----|------------|-----|-----|-----|-----|-------------------------------------------------------------------------------------------------------------|---------------------------|
|               |     |     |     |            |     |     |            |     |     |     |     | with existing knowledge                                                                                     |                           |
| Snaman 2016   | Yes | Yes | Yes | Can't tell | Yes | Yes | Yes        | Yes | Yes | Yes | Yes | Considers other work in the area and identifies techniques the can be used by clinicians                    | No or very minor concerns |
| Sullivan 2018 | Yes | Yes | YEs | Can't tell | Yes | Yes | Can't tell | Yes | Yes | Yes | Yes | Clear about new findings, and what the study adds to existing knowledge and in comparison to other research | No or very minor concerns |
| Thornton 2020 | Yes | Yes | Yes | Yes        | Yes | Yes | Can't tell | Yes | Yes | Yes | Yes | Discusses results in context of other research and gives clear implications for practice                    | No or very minor concerns |

|                  |     |     |     |     |     |     |            |     |     |     |                                                                                          |                           |
|------------------|-----|-----|-----|-----|-----|-----|------------|-----|-----|-----|------------------------------------------------------------------------------------------|---------------------------|
| Thornton<br>2021 | Yes | Yes | Yes | Yes | Yes | Yes | Can't tell | Yes | Yes | Yes | Discusses results in context of other research and gives clear implications for practice | No or very minor concerns |
| Vickers<br>2000  | Yes | Yes | Yes | Yes | Yes | Yes | Can't tell | Yes | Yes | Yes | Discussion in relation to existing knowledge, identification of knowledge gap            | No or very minor concerns |
